# Supplementary material
Source: PubMed Central journal article supplement (PMC7970387)
Supplement: jamasurg-e210021-s001.pdf [file jamasurg-e210021-s001.pdf]

## Supplementary Online Content

Sousa-Pinto B, Blumenthal KG, Courtney L, Mancini CM, Jeffres MN. Assessment of the frequency of dual allergy to penicillins and cefazolin: a systematic review and meta-analysis. *JAMA Surg*. Published online March 17, 2021. doi:10.1001/jamasurg.2021.0021

**eTable 1.** Search Queries Used in the Different Electronic Bibliographic Databases

**eTable 2.** Characteristics of Included Cohort Studies

**eTable 3.** Characteristics of Case Reports Included

**eTable 4.** Risk of Bias of Individual Studies

**This supplementary material has been provided by the authors to give readers additional information about their work.**

**eTable 1. Search queries used in the different electronic bibliographic databases**

| Database           | Search query                                                                                                                                                                                                                                                                                                                                                                                                       |
|--------------------|--------------------------------------------------------------------------------------------------------------------------------------------------------------------------------------------------------------------------------------------------------------------------------------------------------------------------------------------------------------------------------------------------------------------|
| MEDLINE/<br>PubMed | (hypersensitivit*[Text Word] OR hypersensitivity[Text Word] OR allerg*[Text Word] OR allergy[Text Word] OR cross-reactiv*[Text Word])<br><br>AND (penicillin*[Text Word] OR amoxicillin[Text Word] OR ampicillin[Text Word] OR aminopenicillin[Text Word]) AND<br><br>(cefazolin[Text Word] OR cephalosporin*[Title/Abstract])                                                                                     |
| Web of Science     | (TS=hypersensitivit* OR TS=hypersensitivity OR TS=allerg* OR TS=allergy OR TS=cross-reactiv*) AND (TS=penicillin* OR TS=amoxicillin OR TS=ampicillin OR TS=aminopenicillin) AND (TS=cefazolin OR TS=cephazolin OR TS=cephazoline OR TS=ancef OR TS=cephalosporin*)                                                                                                                                                 |
| Embase             | (hypersensitiv*:ti,ab,kw OR hypersensitivity:ti,ab,kw OR allerg*:ti,ab,kw OR allergy:ti,ab,kw OR 'cross react*':ti,ab,kw OR 'cross reaction':ti,ab,kw) AND ('penicillin derivative':ti,ab,kw OR penicillin:ti,ab,kw OR amoxicillin:ti,ab,kw OR ampicillin:ti,ab,kw OR aminopenicillin:ti,ab,kw) AND (cefazolin:ti,ab,kw OR cephalosporin*:ti,ab,kw OR cephalosporin:ti,ab,kw OR cephalosporin derivative:ti,ab,kw) |

**eTable 2. Characteristics of Included Cohort Studies**

| Source, Country                                                                  | Setting    | Age group        | Index HS onset     | Penicillin HS diagnosis method | Cefazolin HS diagnosis method | N of assessed participants | N of participants with dual allergy (%) |
|----------------------------------------------------------------------------------|------------|------------------|--------------------|--------------------------------|-------------------------------|----------------------------|-----------------------------------------|
| <b>Patients with index penicillin allergy and assessed for cefazolin allergy</b> |            |                  |                    |                                |                               |                            |                                         |
| Ahmad et al <sup>17</sup> 2020, USA                                              | Surgical   | Not specified    | Not specified      | Self-reported                  | Exposure                      | 5                          | 0 (0)                                   |
| Aihara et al <sup>18</sup> 1987, Japan                                           | Outpatient | Adults, children | Delayed            | Skin test, provocation test    | Skin test                     | 11                         | 3 (27.3)                                |
| Anstey et al <sup>19</sup> , 2019, USA                                           | Surgical   | Adults           | Immediate, delayed | Self-reported                  | Exposure                      | 2570                       | 2 (0.1)                                 |
| Beam et al <sup>20</sup> 1984, USA                                               | Surgical   | Adults           | Immediate          | Skin test                      | Skin test                     | 2                          | 1 (50.0)                                |
| Beltran et al <sup>21</sup> 2015, USA                                            | Inpatient  | Adults, children | Immediate, delayed | Self-reported                  | Exposure                      | 127                        | 1 (0.8)                                 |
| Blumenthal et al <sup>22</sup> 2019, USA                                         | Inpatient  | Adults, children | Immediate, delayed | Self-reported                  | Provocation test              | 106                        | 3 (2.8)                                 |
| Blumenthal et al <sup>23</sup> 2015, USA                                         | Inpatient  | Adults           | Immediate, delayed | Self-reported                  | Provocation test              | 21                         | 1 (4.8)                                 |
| Castleton et al <sup>24</sup> 1976, UK                                           | Inpatient  | Adults           | Not specified      | Self-reported                  | Exposure                      | 5                          | 0 (0)                                   |
| Cook et al <sup>25</sup> 2014, USA                                               | Surgical   | Adults           | Immediate, delayed | Skin test                      | Skin test                     | 22                         | 11 (50.0)                               |
| Desai et al <sup>26</sup> 2017, USA                                              | Pregnant   | Adults           | Immediate, delayed | Self-reported                  | Exposure                      | 1332                       | 10 (0.8)                                |
| Desravines et al <sup>27</sup> 2019, USA                                         | Pregnant   | Adults           | Not specified      | Self-reported                  | Exposure                      | 65                         | 0 (0)                                   |
| Fonacier et al <sup>28</sup> 2005, USA                                           | Surgical   | Adults, children | Immediate, delayed | Self-reported                  | Exposure                      | 37                         | 0 (0)                                   |
| Goodman et al <sup>29</sup> 2001, USA                                            | Surgical   | Adults           | Not specified      | Self-reported                  | Exposure                      | 299                        | 1 (0.3)                                 |
| Haslam et al <sup>30</sup> et al. 2012, Canada                                   | Surgical   | Adults           | Delayed            | Self-reported                  | Exposure                      | 54                         | 0 (0)                                   |
| Laaouaj et al. <sup>31</sup> 2016, USA                                           | Surgical   | Adults           | Immediate, delayed | Self-reported                  | Provocation test              | 139                        | 6 (4.3)                                 |

|                                                                                  |                      |                  |                    |                                               |                             |                  |          |
|----------------------------------------------------------------------------------|----------------------|------------------|--------------------|-----------------------------------------------|-----------------------------|------------------|----------|
| Lam et al. <sup>46</sup> 2020, USA                                               | Surgical             | Adults           | Not specified      | Self-reported                                 | Exposure                    | 500 <sup>a</sup> | 0 (0)    |
| Maguire et al. <sup>32</sup> 2020, USA                                           | Emergency department | Adults           | Not specified      | Self-reported                                 | Provocation test            | 14               | 0 (0)    |
| Michaud et al. <sup>33</sup> 2017, Canada                                        | Surgical             | Adults           | Delayed            | Self-reported                                 | Exposure                    | 81               | 0 (0)    |
| Novalbos et al. <sup>68</sup> 2001, Spain                                        | Outpatient           | Adults           | Immediate, delayed | Skin test, provocation test                   | Skin test, provocation test | 41               | 0 (0)    |
| Park et al. <sup>35</sup> 2006, USA                                              | Surgical             | Adults, children | Immediate, delayed | Self-reported                                 | Exposure                    | 19               | 1 (5.3)  |
| Park et al. <sup>36</sup> 2010, USA                                              | Outpatient           | Adults           | Not specified      | Skin test                                     | Exposure                    | 59               | 1 (1.7)  |
| Pines et al. <sup>37</sup> 1977, UK                                              | Inpatient            | Adults           | Not specified      | Self-reported                                 | Provocation test, exposure  | 10               | 1 (10.0) |
| Ponvert et al. <sup>38</sup> 2011, France                                        | Outpatient           | Children         | Not specified      | Skin test                                     | Skin test                   | 150              | 0 (0)    |
| Rodriguez et al. <sup>39</sup> 2019, Spain                                       | Outpatient           | Adults           | Immediate, delayed | Skin test, <i>in vitro</i> , provocation test | Skin test                   | 86               | 0 (0)    |
| Romano et al. <sup>40</sup> 2020, Italy                                          | Outpatient           | Adults           | Immediate          | Skin test, provocation test                   | Skin test, provocation test | 131              | 1 (0.8)  |
| Schlosser et al. <sup>41</sup> 2020, USA                                         | Surgical             | Adults           | Immediate, delayed | Self-reported                                 | Exposure                    | 38               | 0 (0)    |
| Stone et al. <sup>42</sup> 2019, USA                                             | Surgical             | Adults           | Immediate, delayed | Self-reported                                 | Exposure                    | 28               | 0 (0)    |
| Thellier et al. <sup>43</sup> 2020, France                                       | Obstetrics           | Adults           | Immediate, delayed | Self-reported                                 | Exposure                    | 8                | 0 (0)    |
| Trubiano et al. <sup>44</sup> 2019, Australia                                    | Outpatient           | Adults           | Delayed            | Skin test, <i>in vitro</i>                    | Skin test                   | 12               | 0 (0)    |
| Turner et al. <sup>45</sup> 2018, USA                                            | Inpatient            | Adults           | Immediate, delayed | Self-reported                                 | Exposure                    | 29               | 1 (3.4)  |
| <b>Patients with index cefazolin allergy and assessed for penicillin allergy</b> |                      |                  |                    |                                               |                             |                  |          |
| Alves et al. <sup>47</sup> 2015, Portugal                                        | Surgical             | Adults, children | Immediate, delayed | Provocation test                              | Skin test, exposure         | 2                | 0 (0)    |
| Chng et al. <sup>48</sup> 2016, Singapore                                        | Outpatient s         | Adults, children | Immediate, delayed | Skin test                                     | Skin test, provocation test | 4                | 2 (50.0) |

|                                                          |                          |                     |                       |                                                     |                                   |    |           |
|----------------------------------------------------------|--------------------------|---------------------|-----------------------|-----------------------------------------------------|-----------------------------------|----|-----------|
| Cook et al <sup>25</sup><br>2014, USA                    | Surgical                 | Adults              | Immediate,<br>delayed | Skin test                                           | Skin test                         | 24 | 11 (45.8) |
| Farinha et al <sup>49</sup><br>2018, Portugal            | Surgical                 | Adults,<br>children | Immediate             | Skin test,<br>provocation<br>test                   | Skin test,<br>exposure<br>test    | 3  | 1 (33.3)  |
| Jimenez-<br>Rodriguez et al <sup>39</sup><br>2019, Spain | Outpatient,<br>inpatient | Adults              | Immediate             | Skin test, <i>in vitro</i>                          | Skin test                         | 3  | 0 (0)     |
| Kuhlen et al <sup>50</sup><br>2016, USA                  | Surgical                 | Adults              | Immediate             | Skin test,<br>provocation<br>test                   | Skin test,<br>exposure<br>test    | 5  | 0 (0)     |
| Laguna et al <sup>51</sup><br>2018, Spain                | Outpatient               | Adults              | Immediate             | Skin test, <i>in vitro</i> ,<br>provocation<br>test | Skin test,<br>provocation<br>test | 11 | 0 (0)     |
| Li et al <sup>52</sup><br>2019, Australia                | Surgical                 | Adults,<br>children | Immediate             | Provocation<br>test                                 | Skin test,<br>exposure            | 40 | 1 (2.5)   |
| Mota et al <sup>69</sup><br>2018, Portugal               | Surgical                 | Adults              | Immediate             | Skin test, <i>in vitro</i> ,<br>provocation<br>test | Skin test,<br>exposure            | 7  | 0 (0)     |
| Pipet et al <sup>54</sup><br>2011, France                | Outpatient               | Adults,<br>children | Immediate             | Skin test,<br>provocation<br>test                   | Skin test                         | 10 | 1 (10.0)  |
| Romano et al <sup>56</sup><br>2015, Italy                | Outpatient               | Adults,<br>children | Immediate             | Skin test, <i>in vitro</i>                          | Skin test                         | 6  | 0 (0)     |
| Romano et al <sup>55</sup><br>2010, Italy                | Outpatient               | Adults,<br>children | Immediate             | Skin test                                           | Skin test                         | 2  | 0 (0)     |
| Uyttebroek et al <sup>70</sup><br>2016, Belgium          | Surgical                 | Not<br>specified    | Immediate             | Skin test, <i>in vitro</i> ,<br>provocation<br>test | Skin test,<br>exposure            | 19 | 0 (0)     |
| Warrington et al <sup>58</sup><br>1996, Canada           | Surgical                 | Adults              | Immediate             | Skin test                                           | Skin test,<br>exposure            | 4  | 0 (0)     |
| Yuson et al <sup>59</sup><br>2019, Australia             | Outpatient               | Adults              | Immediate             | Skin test, <i>in vitro</i> ,<br>provocation<br>test | Skin test,<br>provocation<br>test | 6  | 0 (0)     |

Abbreviations: HS, hypersensitivity; USA, United States of America; UK, United Kingdom

<sup>a</sup> Estimate sample size based on figure

**eTable 3. Characteristics of case reports Included**

| Case study                                                                       | Sex           | Age           | Index HS onset | Penicillin HS diagnosis method | Cefazolin HS diagnosis method  | Dual allergy to penicillin and cefazolin |
|----------------------------------------------------------------------------------|---------------|---------------|----------------|--------------------------------|--------------------------------|------------------------------------------|
| <b>Patients with index penicillin allergy and assessed for cefazolin allergy</b> |               |               |                |                                |                                |                                          |
| Ahmed et al <sup>71</sup> 2012,                                                  | Not specified | 1             | Delayed        | Skin test                      | Exposure                       | No                                       |
| Alves et al <sup>47</sup> 2015                                                   | F             | 50            | Immediate      | Skin test                      | Exposure                       | No                                       |
| Berrocal et al <sup>72</sup> 2001                                                | F             | 70            | Immediate      | Self-reported                  | Exposure                       | Yes                                      |
| Castro et al <sup>73</sup> 1996                                                  | M             | 3             | Delayed        | Skin test, provocation test    | Skin test                      | No                                       |
| Christen et al <sup>74</sup> 1990                                                | M             | 43            | Delayed        | Self-reported                  | Exposure                       | No                                       |
| Eser Simsek et al <sup>75</sup> 2018                                             | F             | 10            | Immediate      | Skin test, provocation test    | Provocation test               | No                                       |
| Fitzgerald et al <sup>76</sup> 2016                                              | Not specified | 66            | Immediate      | Self-reported                  | Exposure                       | No                                       |
| Freedman et al <sup>77</sup> 1997                                                | F             | 40            | Not specified  | Self-reported                  | Exposure                       | No                                       |
| Gonzalez-Delgado et al <sup>78</sup> 2006                                        | F             | 7             | Delayed        | Skin test, patch test          | Skin test, patch test          | No                                       |
| Ho et al <sup>79</sup> 2004                                                      | F             | 74            | Delayed        | <i>in vitro</i>                | <i>in vitro</i> IgE            | No                                       |
| Jao et al <sup>80</sup> 2006                                                     | F             | 37            | Not specified  | Self-reported                  | Exposure                       | Yes                                      |
| Kraushar et al <sup>81</sup> 1994                                                | F             | 72            | Not specified  | Self-reported                  | Exposure                       | Yes                                      |
| Moake et al <sup>82</sup> 1978                                                   | F             | 39            | Immediate      | <i>in vitro</i>                | <i>in vitro</i> IgE            | Yes                                      |
| Nemati et al <sup>83</sup> 1981                                                  | M             | 24            | Delayed        | Self-reported                  | Exposure                       | Yes                                      |
| Philips et al <sup>84</sup> 2001                                                 | Not specified | Not specified | Delayed        | Skin test, patch test          | Skin test                      | Yes                                      |
| Vogt et al <sup>85</sup> 1998                                                    | F             | 46            | Delayed        | Self-reported                  | Exposure                       | No                                       |
| <b>Patients with index cefazolin allergy and assessed for penicillin allergy</b> |               |               |                |                                |                                |                                          |
| Almeida et al <sup>86</sup> 2017                                                 | F             | 36            | Immediate      | Provocation test               | Skin test, <i>in vitro</i> IgE | No                                       |
| Almeida et al <sup>86</sup> 2017                                                 | F             | 49            | Immediate      | Provocation test               | Skin test, <i>in vitro</i> IgE | No                                       |
| Chan et al <sup>87</sup> 2016                                                    | Not specified | Not specified | Immediate      | Skin test                      | Skin test                      | Yes                                      |
| Culp et al <sup>88</sup> 2017                                                    | M             | 44            | Immediate      | Skin test, <i>in vitro</i>     | Exposure                       | No                                       |

|                                                                                                  |               |               |               |                                                           |                                                              |     |
|--------------------------------------------------------------------------------------------------|---------------|---------------|---------------|-----------------------------------------------------------|--------------------------------------------------------------|-----|
| Gonzalo-Garijo et al <sup>89</sup> 2006                                                          | F             | 66            | Not specified | Skin test, provocation test                               | Skin test                                                    | No  |
| Igea et al <sup>90</sup> 1992                                                                    | F             | 21            | Immediate     | Skin test, provocation test                               | Skin test, <i>in vitro</i> IgE                               | No  |
| Igea et al <sup>90</sup> 1992                                                                    | F             | 45            | Immediate     | Skin test, provocation test                               | Skin test, <i>in vitro</i> IgE                               | No  |
| Lee et al <sup>91</sup> 2004                                                                     | F             | 46            | Immediate     | Skin test                                                 | Skin test                                                    | No  |
| Padial et al <sup>92</sup> 2008                                                                  | Not specified | 43            | Delayed       | Skin test, provocation test                               | Skin test, provocation test                                  | No  |
| Pinheiro et al <sup>93</sup> 2018                                                                | F             | 31            | Delayed       | Patch test                                                | Patch test                                                   | Yes |
| Romano et al 2001 <sup>94</sup>                                                                  | F             | 44            | Delayed       | Skin test, patch test, <i>in vitro</i> , provocation test | Skin test, patch test, <i>in vitro</i> IgE, provocation test | No  |
| Romeira et al <sup>63</sup> 2017                                                                 | Not specified | Not specified | Not specified | Skin test                                                 | Skin test                                                    | No  |
| Somech et al <sup>95</sup> 2009                                                                  | M             | 12            | Immediate     | Skin test, provocation test                               | Skin test                                                    | No  |
| Tayman et al <sup>96</sup> 2008                                                                  | F             | 0             | Immediate     | Skin test, <i>in vitro</i>                                | Skin test, <i>in vitro</i> IgE                               | Yes |
| Velasco et al <sup>97</sup> 2009                                                                 | F             | 63            | Delayed       | Skin test, patch test, <i>in vitro</i> , provocation test | Skin test, patch test, <i>in vitro</i> IgE, provocation test | No  |
| Vieira et al <sup>98</sup> 2009                                                                  | M             | 32            | Immediate     | Skin test, <i>in vitro</i>                                | Skin test                                                    | No  |
| Weber et al <sup>99</sup> 1996                                                                   | F             | 33            | Immediate     | Skin test, provocation test                               | Skin test                                                    | No  |
| Wieczorek et al <sup>100</sup> 2008                                                              | F             | 18            | Immediate     | Skin test, <i>in vitro</i> , provocation test             | Skin test, <i>in vitro</i> IgE                               | No  |
| Yun et al <sup>101</sup> 2016                                                                    | M             | 26            | Immediate     | Skin test                                                 | Skin test                                                    | No  |
| <b>Patients with index beta-lactam allergy and assessed for penicillin and cefazolin allergy</b> |               |               |               |                                                           |                                                              |     |
| Classen et al <sup>102</sup> 2015                                                                | F             | 24            | Not specified | Skin test                                                 | Skin test, patch test                                        | Yes |
| Gonzalo-Garijo et al <sup>89</sup> 2006                                                          | M             | 80            | Not specified | Skin test, provocation test                               | Skin test                                                    | No  |
| Rozlucka et al <sup>103</sup> 2019                                                               | Not specified | 65            | Not specified | Skin test, provocation test                               | Skin test, provocation test                                  | No  |

**eTable 4. Risk of bias of individual studies**

| Study                                                                                  | Risk of Bias                            |                      |                   |                                     |                                             |
|----------------------------------------------------------------------------------------|-----------------------------------------|----------------------|-------------------|-------------------------------------|---------------------------------------------|
|                                                                                        | Representation of the target population | Consecutive sampling | Non-response bias | Definition of the allergic reaction | Consistency of data collection / assessment |
| <b>Studies assessing patients with index penicillin allergy (tested for cefazolin)</b> |                                         |                      |                   |                                     |                                             |
| Castleton B (1976)                                                                     | ●                                       | ●                    | ●                 | ●                                   | ●                                           |
| Pines A (1977)                                                                         | ●                                       | ●                    | ●                 | ●                                   | ●                                           |
| Beam TR (1984)                                                                         | ●                                       | ●                    | ●                 | ●                                   | ●                                           |
| Aihara M (1987)                                                                        | ●                                       | ●                    | ●                 | ●                                   | ●                                           |
| Goodman EJ (2001)                                                                      | ●                                       | ●                    | ●                 | ●                                   | ●                                           |
| Novalbos A (2001)                                                                      | ●                                       | ●                    | ●                 | ●                                   | ●                                           |
| Fonacier L (2005)                                                                      | ●                                       | ●                    | ●                 | ●                                   | ●                                           |
| Park M (2006)                                                                          | ●                                       | ●                    | ●                 | ●                                   | ●                                           |
| Park M (2010)                                                                          | ●                                       | ●                    | ●                 | ●                                   | ●                                           |
| Ponvert C (2011)                                                                       | ●                                       | ●                    | ●                 | ●                                   | ●                                           |
| Haslam S (2012)                                                                        | ●                                       | ●                    | ●                 | ●                                   | ●                                           |
| Cook DJ (2014)                                                                         | ●                                       | ●                    | ●                 | ●                                   | ●                                           |
| Beltran RJ (2015)                                                                      | ●                                       | ●                    | ●                 | ●                                   | ●                                           |
| Blumenthal KG (2015)                                                                   | ●                                       | ●                    | ●                 | ●                                   | ●                                           |
| Laaouaj J (2016)                                                                       | ●                                       | ●                    | ●                 | ●                                   | ●                                           |

|                                                                                         |   |   |   |   |   |
|-----------------------------------------------------------------------------------------|---|---|---|---|---|
| Desai SH (2017)                                                                         | ● | ● | ● | ● | ● |
| Michaud L (2017)                                                                        | ● | ● | ● | ● | ● |
| Turner NA (2018)                                                                        | ● | ● | ● | ● | ● |
| Astey K (2019)                                                                          | ● | ● | ● | ● | ● |
| Blumenthal KG (2019)                                                                    | ● | ● | ● | ● | ● |
| Desravines N (2019)                                                                     | ● | ● | ● | ● | ● |
| Jimenez-Rodriguez T (2019)                                                              | ● | ● | ● | ● | ● |
| Schlosser KA (2019)                                                                     | ● | ● | ● | ● | ● |
| Thellier C (2019)                                                                       | ● | ● | ● | ● | ● |
| Trubiano J (2019)                                                                       | ● | ● | ● | ● | ● |
| Ahmad H (2020)                                                                          | ● | ● | ● | ● | ● |
| Lam PW (2020)                                                                           | ● | ● | ● | ● | ● |
| Maguire M (2020)                                                                        | ● | ● | ● | ● | ● |
| Romano A (2020)                                                                         | ● | ● | ● | ● | ● |
| <b>Studies assessing patients with index cefazolin allergy (tested for penicillins)</b> |   |   |   |   |   |
| Warrington RJ (1996)                                                                    | ● | ● | ● | ● | ● |
| Romano A (2010)                                                                         | ● | ● | ● | ● | ● |
| Pipet A (2011)                                                                          | ● | ● | ● | ● | ● |
| Cook DJ (2014)                                                                          | ● | ● | ● | ● | ● |
| Alves C (2015)                                                                          | ● | ● | ● | ● | ● |
| Romano A (2015)                                                                         | ● | ● | ● | ● | ● |
| Chng H (2016)                                                                           | ● | ● | ● | ● | ● |
| Kuhlen JL (2016)                                                                        | ● | ● | ● | ● | ● |
| Uyttebroek AP (2016)                                                                    | ● | ● | ● | ● | ● |
| Farinha SM (2018)                                                                       | ● | ● | ● | ● | ● |
| Laguna JJ (2018)                                                                        | ● | ● | ● | ● | ● |
| Mota I (2018)                                                                           | ● | ● | ● | ● | ● |
| Jimenez-Rodriguez T (2019)                                                              | ● | ● | ● | ● | ● |
| Li J (2019)                                                                             | ● | ● | ● | ● | ● |
| Yuson C (2019)                                                                          | ● | ● | ● | ● | ● |

**Legend:** ● - Low risk of bias; ● - Unclear risk of bias; ● - High risk of bias.
